# Supplementary material
Source: Springer Nature journal article supplement (https://www.springermedizin.de/resource/supplementary/12967_2010_703_MOESM3_ESM.pdf/9577314)

**imDC incubated with:**

**medium**

**NP**

**mDC**

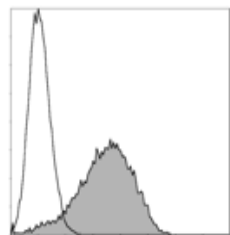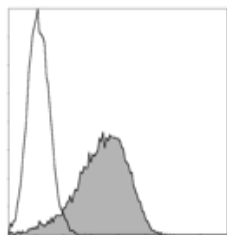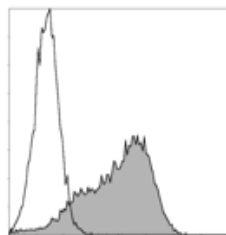

HLA-DR

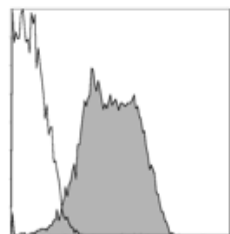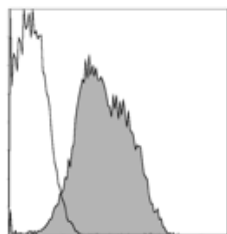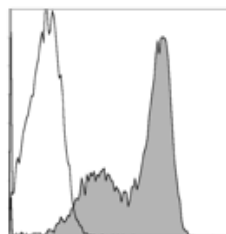

CD86

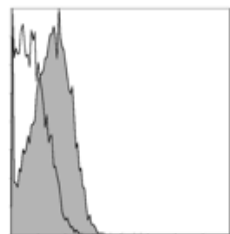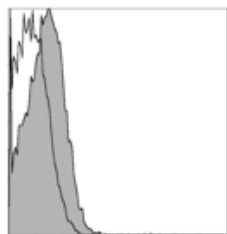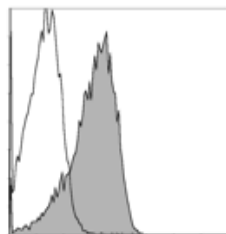

CD83

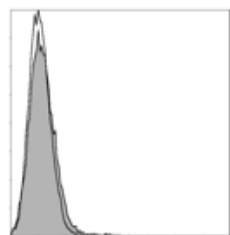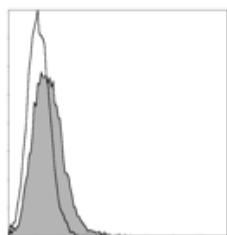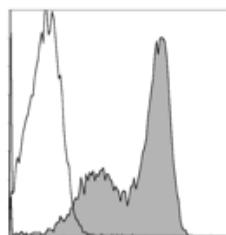

CD80

Supplement: MOESM3 [file 9577314]
